# Supplementary material for: Direct Potential Modulation of Neurogenic Differentiation Markers by Granulocyte-Colony Stimulating Factor (G-CSF) in the Rodent Brain
Source: MDPI journal article supplement (doi:10.3390/pharmaceutics14091858), 2022-09-02

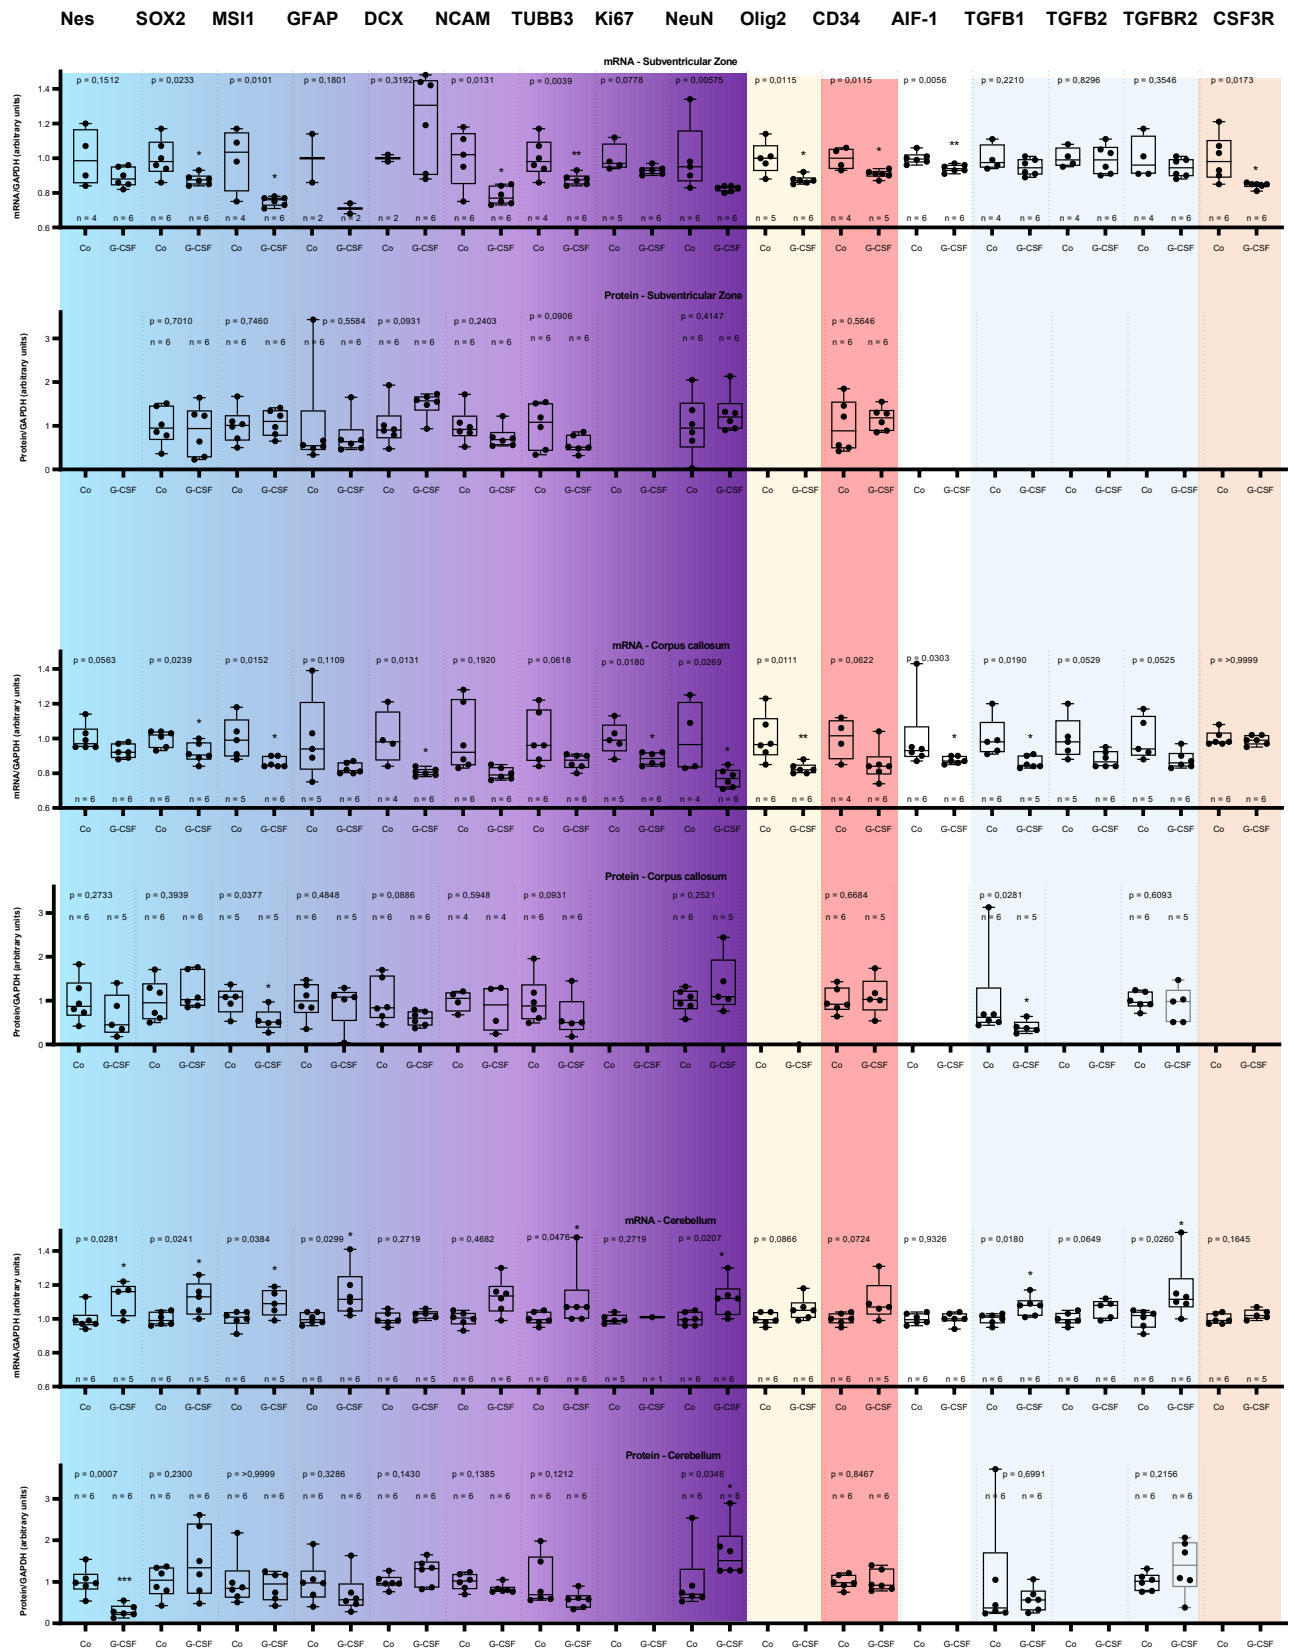

**Supplementary data. Overview of all results of mRNA and protein data in all brain regions.** All parameters were tested for Gaussian distribution using D'Augostino-Pearson omnibus normality test. Afterwards, all parameters were analyzed using a two-tailed Student's t-test or Mann-Whitney test, depending on Gaussian distribution. Data are presented as median with min to max. Significance was taken at  $p \leq 0.05$  (\*),  $p \leq 0.01$  (\*\*),  $p \leq 0.001$  (\*\*\*), a trend was noticed at  $p \leq 0.1$ . Numbers (n) are given for each group.

Nes SOX2 MSI1 GFAP DCX NCAM TUBB3 Ki67 NeuN Olig2 CD34 AIF-1 TGFB1 TGFB2 TGFB2 CSF3R

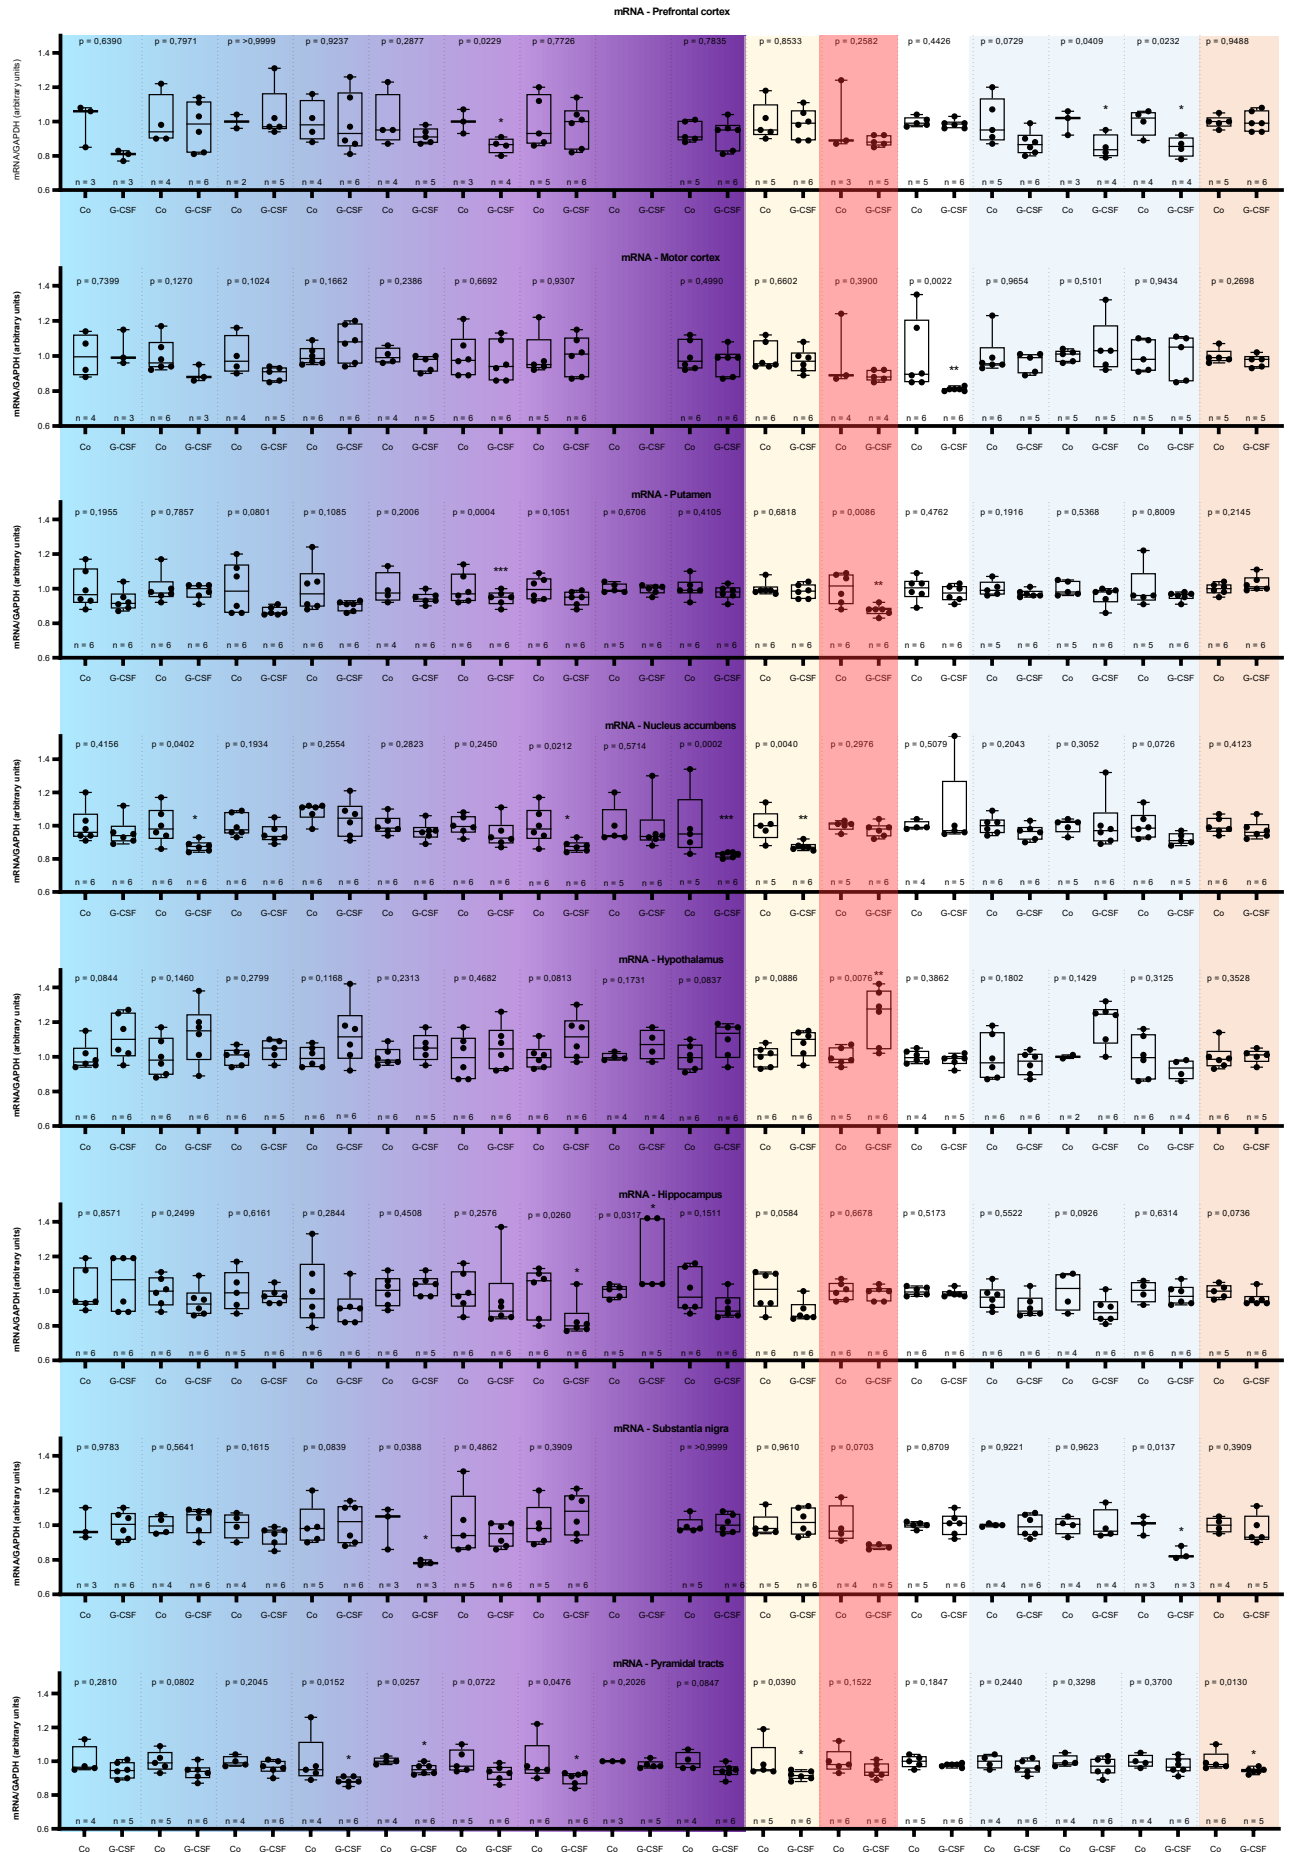

Supplement: s1 [file s1]
